# Supplementary material for: Chemometric perspectives on plankton community responses to natural iron fertilisation over and downstream of the Kerguelen Plateau in the Southern Ocean
Source: Copernicus journal article supplement (doi:10.5194/bg-12-1029-2015), 2015-02-18
Supplement: Supplementary file 1 [file bg-12-1029-2015-supplement.zip]

Archive with 6 entries (5 files):
- Animation_keops2bloom2011_2012.mp4
- Supplementary Material.pdf
- __MACOSX/
- __MACOSX/._Animation_keops2bloom2011_2012.mp4
- __MACOSX/._Supplementary Material.pdf
- bg-12-1029-2015-supplement-cover-letter.pdf
