# Supplementary material for: Chemometric perspectives on plankton community responses to natural iron fertilisation over and downstream of the Kerguelen Plateau in the Southern Ocean
Source: Copernicus journal article supplement (doi:10.5194/bg-12-1029-2015), 2015-02-18
Supplement: Supplementary file 1 [file bg-12-1029-2015-supplement.zip › Supplementary Material.pdf]

## **Supplementary Material**

File: Animation\_keops2bloom2011\_2012.mp4

The animation shows a full annual cycle of phytoplankton bloom development over and downstream of the Kerguelen plateau from daily 8km resolution NASA MODIS Aqua chlorophyll images. The images were provided by SSALTO/DUACS at CLS with support from the Centre Nationale des Etudes Spatiales, Toulouse, France.
