# Supplementary material for: Chemometric perspectives on plankton community responses to natural iron fertilisation over and downstream of the Kerguelen Plateau in the Southern Ocean
Source: Copernicus journal article supplement (doi:10.5194/bg-12-1029-2015), 2015-02-18
Supplement: Supplementary file 3 [file bg-12-1029-2015-supplement.zip]

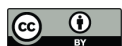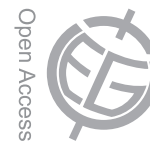

## *Supplement of*

# **Chemometric perspectives on plankton community responses to natural iron fertilisation over and downstream of the Kerguelen Plateau in the Southern Ocean**

**T. W. Trull et al.**

*Correspondence to:* T. W. Trull ([tom.trull@csiro.au](mailto:tom.trull@csiro.au))

- [bg-12-1029-2015-supplement-cover-letter.pdf](#)
- [Animation\\_keops2bloom2011\\_2012.mp4](#)
- [Supplementary Material.pdf](#)
- [\\_\\_MACOSX](#)
  - [.\\_Animation\\_keops2bloom2011\\_2012.mp4](#)
  - [.\\_Supplementary Material.pdf](#)
